# Supplementary material for: Vessel architecture imaging using multiband gradient-echo/spin-echo EPI
Source: PubMed Central journal article supplement (PMC6688807; doi:10.1371/journal.pone.0220939), 2019-08-09
Supplement: pone.0220939.s001.pdf [file pone.0220939.s001.pdf]

| No.  | Singleband<br>GE | Muliband<br>GE | Singleband<br>SE | Multiband<br>SE |
|------|------------------|----------------|------------------|-----------------|
| 1    | 93,62            | 88,65          | 33,07            | 31,88           |
| 2    | 118,34           | 113,93         | 42,57            | 41,51           |
| 3    | 134              | 128,72         | 44,22            | 42,63           |
| 4    | 103,85           | 97,31          | 33,98            | 32,18           |
| 5    | 101,83           | 95,23          | 33,95            | 32,74           |
| 6    | 98,39            | 91,78          | 34,3             | 32,02           |
| 7    | 92,35            | 88,22          | 40,82            | 39,29           |
| 8    | 101,08           | 95,78          | 38,48            | 37,01           |
| 9    | 117,17           | 111,45         | 37,97            | 36,75           |
| 10   | 75,6             | 71,57          | 33,97            | 33,41           |
| 11   | 129,89           | 123,95         | 42,25            | 40,61           |
| 12   | 137,08           | 130,15         | 47,7             | 45,07           |
| 13   | 114,6            | 108,39         | 43,19            | 41,54           |
| 14   | 80,84            | 76,05          | 36,86            | 35,08           |
| 15   | 82,11            | 76,27          | 39,15            | 37,16           |
| 16   | 117,91           | 111,41         | 38,85            | 36,81           |
| 17   | 104,29           | 106,69         | 35,57            | 36,74           |
| 18   | 95,51            | 88,84          | 33,89            | 32,58           |
| 19   | 100,08           | 95,06          | 37,17            | 36,02           |
| 20   | 95,44            | 89,77          | 35,03            | 33,29           |
| 21   | 131,36           | 125,8          | 45,84            | 43,89           |
| 22   | 120,53           | 111,58         | 47,1             | 45,01           |
| 23   | 106,1            | 106,33         | 47,32            | 48,51           |
| 24   | 93,62            | 90,8           | 33,07            | 32,49           |
| 25   | 113,09           | 105,75         | 38,8             | 36,85           |
| 26   | 84,47            | 82,18          | 32,97            | 30,79           |
| 27   | 107,93           | 101,43         | 31,77            | 29,91           |
| 28   | 128,83           | 121,32         | 39,26            | 36,8            |
| 29   | 105,45           | 99,74          | 38,52            | 36,75           |
| 30   | 106              | 100,22         | 35,3             | 34,15           |
| 31   | 107,4            | 102,36         | 33,76            | 32,11           |
| 32   | 112,2            | 105,77         | 36,14            | 34,94           |
| Mean | 106,59           | 101,33         | 38,21            | 36,77           |
| Std. | 15,53            | 14,97          | 4,61             | 4,63            |
