# Supplementary material for: Vessel architecture imaging using multiband gradient-echo/spin-echo EPI
Source: PubMed Central journal article supplement (PMC6688807; doi:10.1371/journal.pone.0220939), 2019-08-09
Supplement: pone.0220939.s002.pdf [file pone.0220939.s002.pdf]

### G-factor Comparison

| No.  | GE   | SE   |
|------|------|------|
| 1    | 1,3  | 1,26 |
| 2    | 1,36 | 1,36 |
| 3    | 1,64 | 1,64 |
| 4    | 1,21 | 1,2  |
| 5    | 1,27 | 1,25 |
| 6    | 1,32 | 1,28 |
| 7    | 1,42 | 1,4  |
| 8    | 1,4  | 1,39 |
| 9    | 1,41 | 1,39 |
| 10   | 1,22 | 1,2  |
| 11   | 1,52 | 1,49 |
| 12   | 1,28 | 1,28 |
| 13   | 1,25 | 1,23 |
| 14   | 1,31 | 1,3  |
| 15   | 1,31 | 1,28 |
| 16   | 1,2  | 1,18 |
| 17   | 1,37 | 1,34 |
| 18   | 1,2  | 1,16 |
| 19   | 1,44 | 1,4  |
| 20   | 1,34 | 1,33 |
| 21   | 1,3  | 1,27 |
| 22   | 1,34 | 1,29 |
| 23   | 1,54 | 1,51 |
| 24   | 1,25 | 1,21 |
| 25   | 1,39 | 1,36 |
| 26   | 1,53 | 1,49 |
| 27   | 1,32 | 1,33 |
| 28   | 1,41 | 1,41 |
| 29   | 1,29 | 1,3  |
| 30   | 1,49 | 1,47 |
| 31   | 1,25 | 1,24 |
| 32   | 1,37 | 1,36 |
| Mean | 1,35 | 1,33 |
| Std. | 0,11 | 0,11 |
